# Supplementary material
Source: PubMed Central journal article supplement (PMC3791267)
Supplement: mmc1.pdf [file mmc1.pdf]

## Supplemental Data

### Mutations in *NALCN* Cause an Autosomal-Recessive Syndrome with Severe Hypotonia, Speech Impairment, and Cognitive Delay

Moeenaldeen D. Al-Sayed, Hamad Al-Zaidan, AlBandary Albakheet, Hana Hakami, Rosan Kenana, Yusra Al-Yafee, Mazhor Al-Dosary, Alya Qari, Tarfa Al-Sheddi, Muhammed Al-Muheiza, Wafa Al-Qubbaj, Yamina Lakmache, Hindi Al-Hindi, Muhammad Ghaziuddin, Dilek Colak, and Namik Kaya

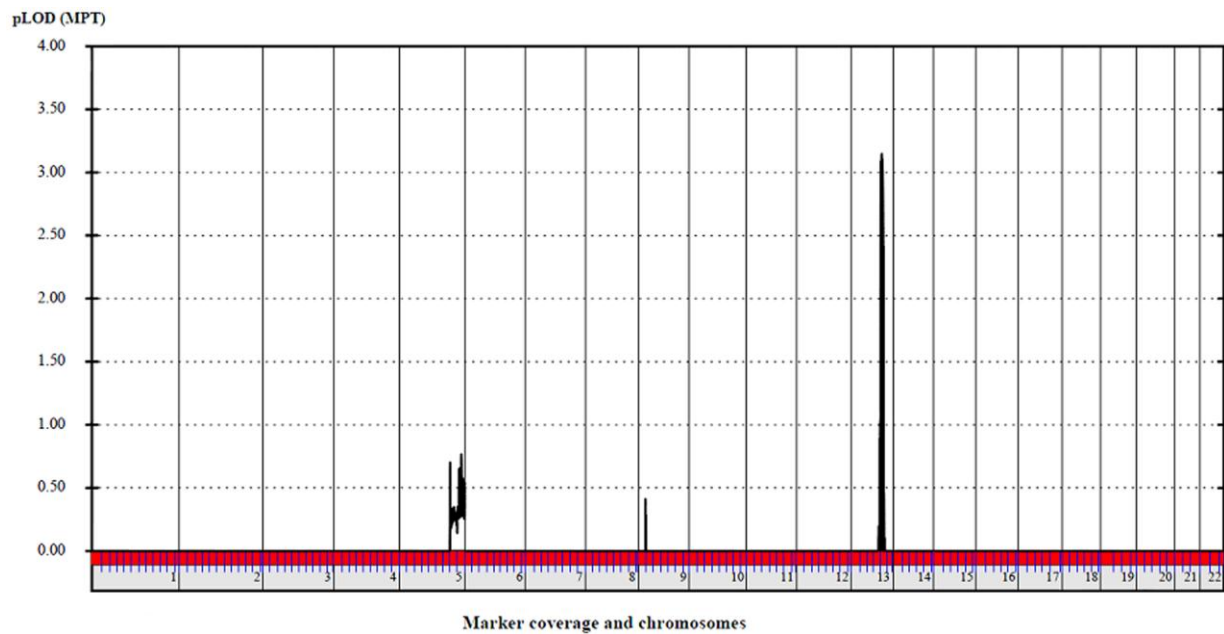

**Figure S1. Linkage results for family 1.**

Linkage analysis in the consanguineous Saudi family results in a peak of LOD score 3.1485 on chromosome 13. The analysis results were generated by GeneHunter/Easy Linkage software.

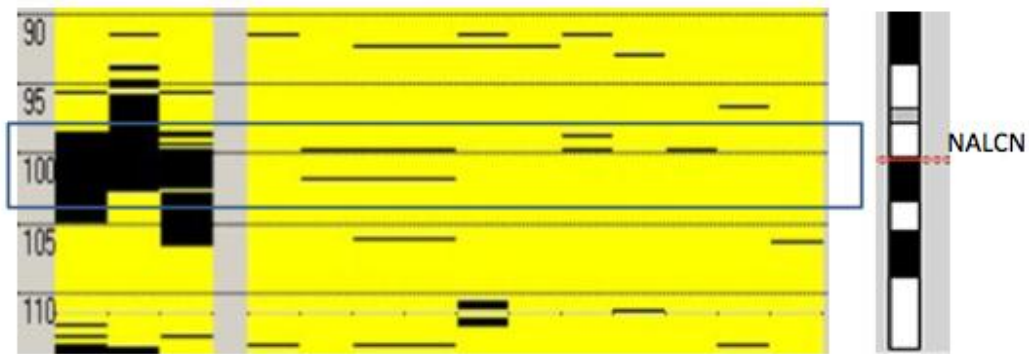

**Figure S2. AutoSNPa results for family 1**

DNA samples from the consanguineous Saudi family were extracted by standard procedures and genotyped on Affymetrix GeneChip Human Custom Mapping Axiom Arrays. Runs of homozygosity blocks from whole-genome DNA profiles were assembled using AutoSNPa software that disclosed a single shared homozygosity block on chromosome 13 (Left panel; affected individuals, IV-1, V-1, and V-2).

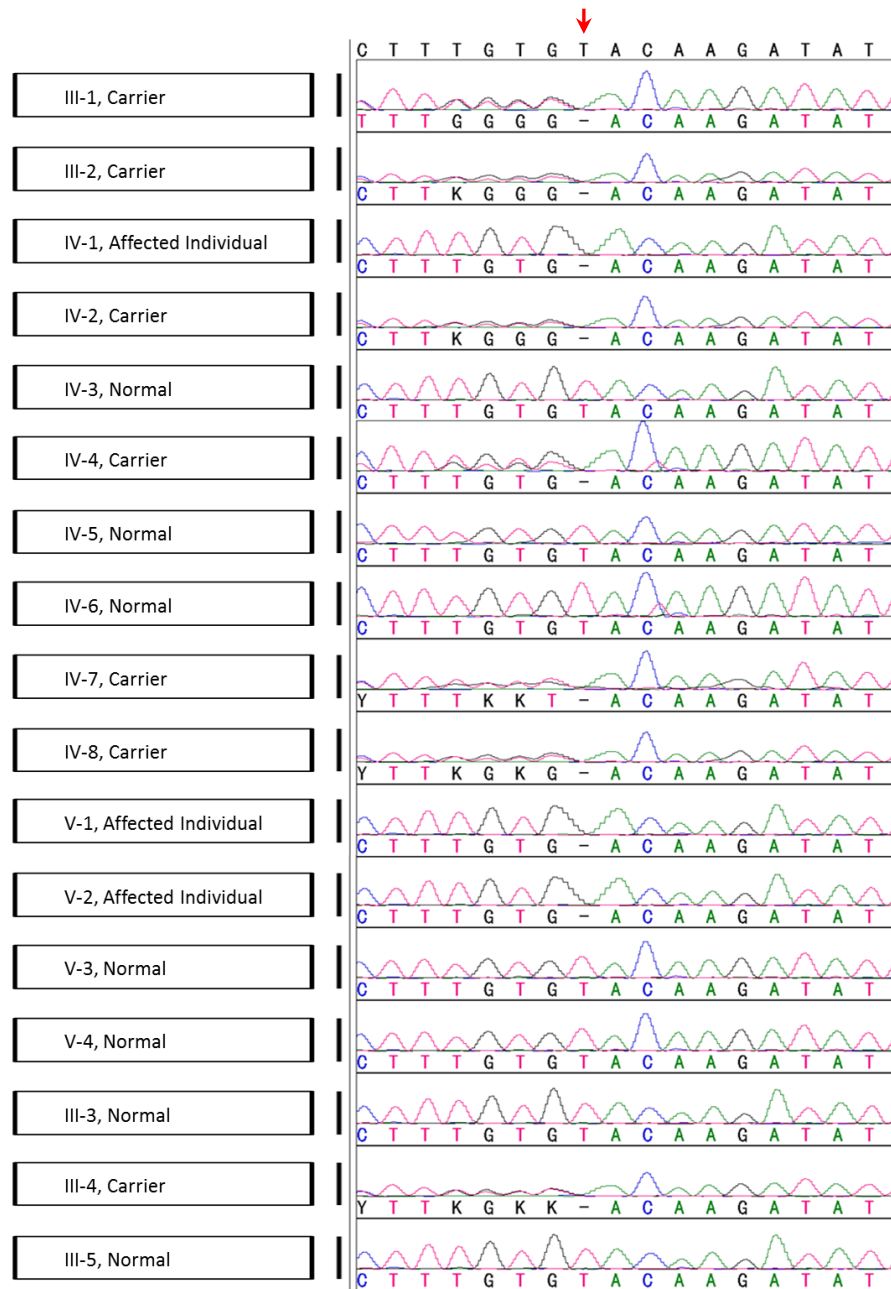

**Figure S3. Chromatogram showing c1489delT; pTyr497Thrfs\*21 in family 1**

Segregation analysis of c1489delT in the consanguineous Saudi family shows presence of the carriers, and affected and normal individuals in the family 1.

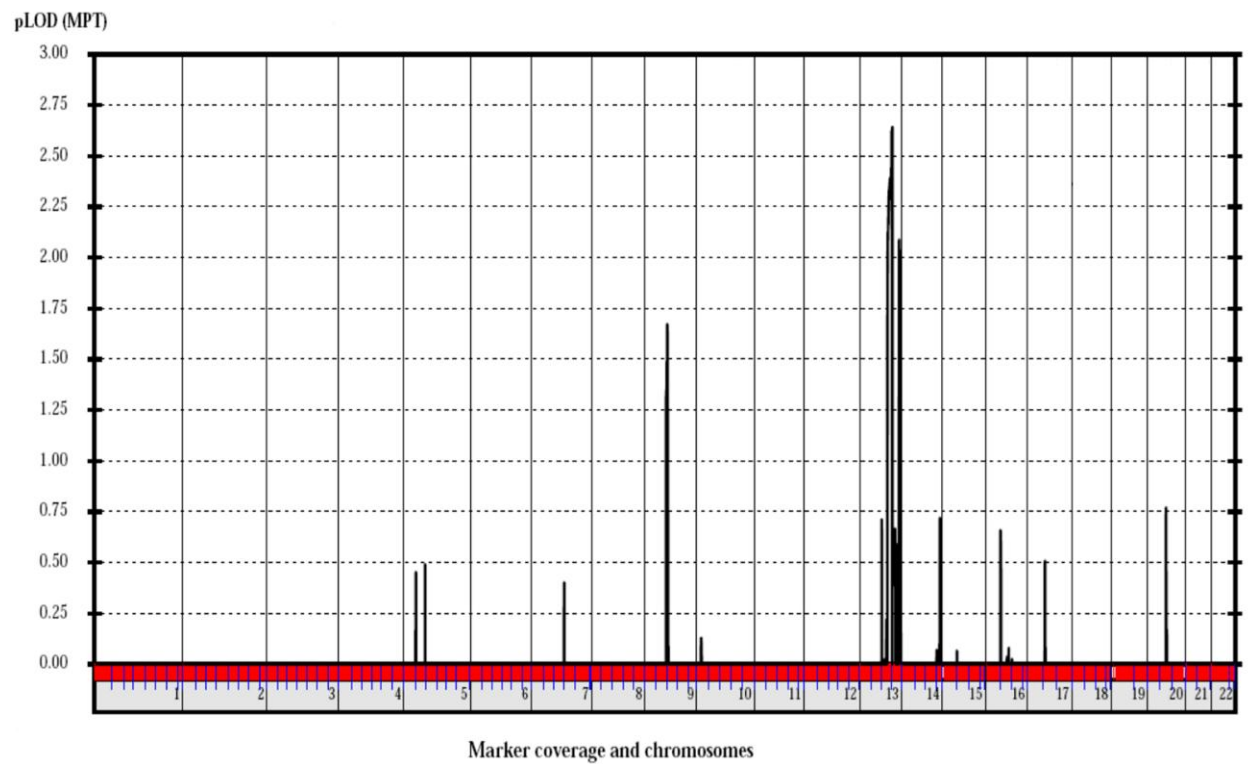

**Figure S4. Linkage results for family 2**

Multipoint parametric linkage analysis in the family 2 revealed a dominant linkage peak with a LOD score of 2.6409 on chromosome 13.

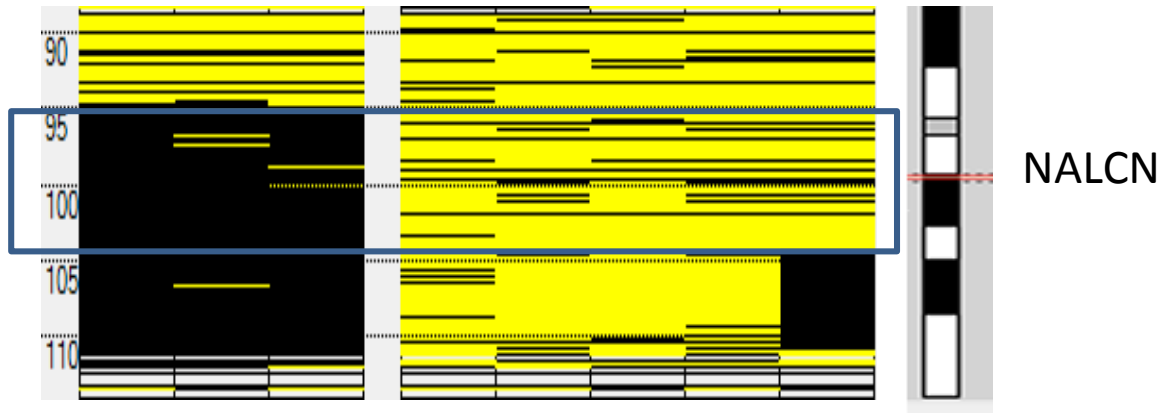

**Figure S5. AutoSNPa Results for Family 2**

Runs of homozygosity (ROH) blocks generated using genome-wide SNP genotyping calls. ROH profiles were aligned using AutoSNPa software. A single shared homozygosity block on chromosome 13 (Left panel; affected individuals in the family 2) was identified from the analysis of individuals II-1, II-2, and II-3.

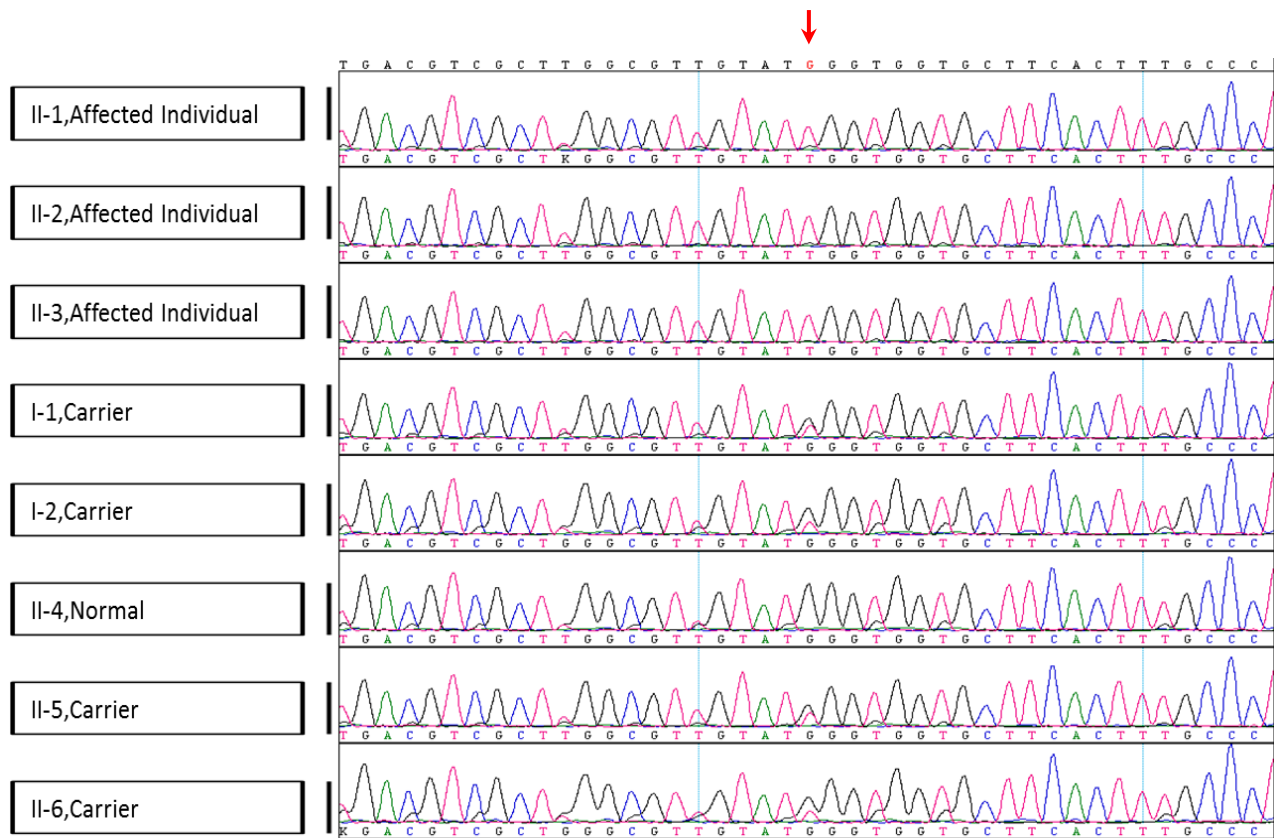

**Figure S6. Chromatogram showing c.G3860T; pW1287L missense mutation in family 2.**

Sequencing chromatogram from all the available individuals in the family indicated segregation of c.G3860T in *NALCN* in this consanguineous Saudi family.

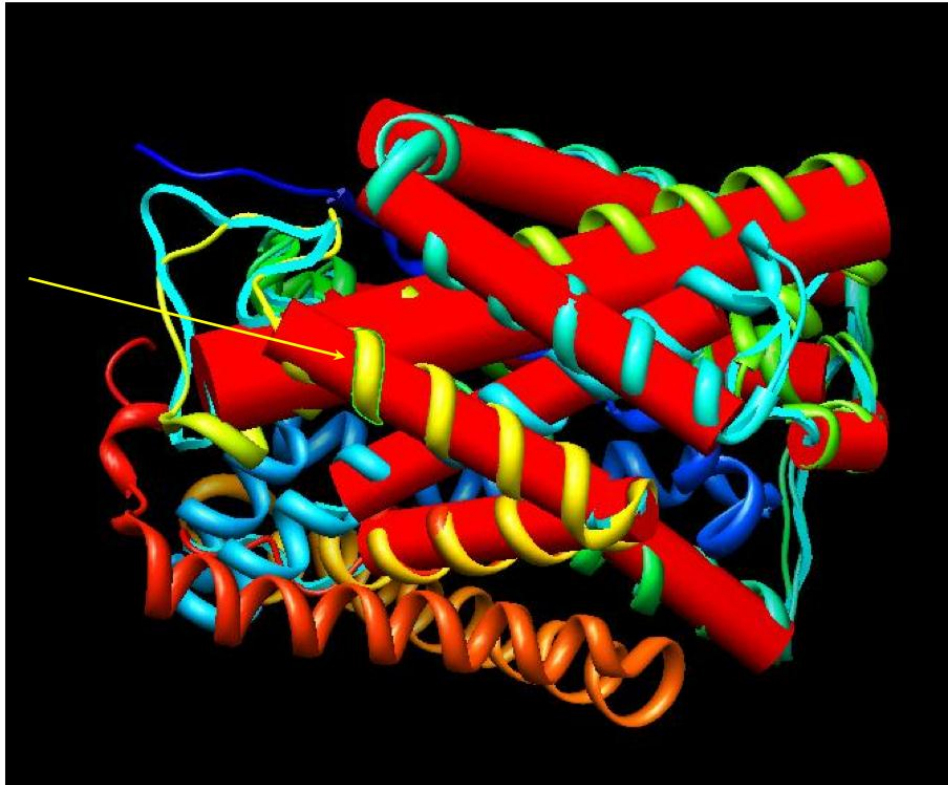

**Figure S7. Location of p.W1287L on 3-D structure**

The three-D structure image was generated based on UniProt ID:Q8IZF0 and location of p.W1287L of *NALCN* depicted on the structure using Chimera software.

**Table S1. Detailed clinical and demographic information of the affected individuals with the NALCN defect**

|                                                                                       | FAMILY 1                                                                                                                                                |                                                                                                                                                         |                                                                                                                                                                                             | FAMILY 2                                                                                          |                                                                                                   |                                                                                                               |
|---------------------------------------------------------------------------------------|---------------------------------------------------------------------------------------------------------------------------------------------------------|---------------------------------------------------------------------------------------------------------------------------------------------------------|---------------------------------------------------------------------------------------------------------------------------------------------------------------------------------------------|---------------------------------------------------------------------------------------------------|---------------------------------------------------------------------------------------------------|---------------------------------------------------------------------------------------------------------------|
| <b>Individuals</b>                                                                    | <b>IV-1</b>                                                                                                                                             | <b>V-1</b>                                                                                                                                              | <b>V-2</b>                                                                                                                                                                                  | <b>II-1</b>                                                                                       | <b>II-2</b>                                                                                       | <b>II-3</b>                                                                                                   |
| <b>Age (years)</b>                                                                    | 7 years, 3 months                                                                                                                                       | 7 years, 1 month                                                                                                                                        | 4 years, 4 months                                                                                                                                                                           | 17 years, 6 months                                                                                | 16 years                                                                                          | 9 years, 4 months                                                                                             |
| <b>Gender</b>                                                                         | Male                                                                                                                                                    | Male                                                                                                                                                    | Male                                                                                                                                                                                        | Female                                                                                            | Female                                                                                            | Female                                                                                                        |
| <b>Demographics/<br/>Geographical<br/>Information</b>                                 | Central Region                                                                                                                                          | Central Region                                                                                                                                          | Central Region                                                                                                                                                                              | North Region                                                                                      | North Region                                                                                      | North Region                                                                                                  |
| <b>Age at<br/>presentation</b>                                                        | Birth                                                                                                                                                   | Birth                                                                                                                                                   | Birth                                                                                                                                                                                       | Birth                                                                                             | Birth                                                                                             | Birth                                                                                                         |
| <b>Birth &amp; Neonatal<br/>History</b>                                               | Cesarean Section due to Fetal Distress<br>Bw-2.6 Kg<br>Meconium Stain<br>Floppy<br>Transient<br>Thrombocytopenia<br>Feeding difficulties-Poor sucking   | Normal Delivery<br>BW 4 Kg<br>Floppy<br>Feeding difficulties-Poor sucking                                                                               | C-Section due to previous one.<br>Bw-2.5 Kg<br>Floppy<br>Meconium<br>Aspiration<br>Suspected<br>Hirschsprung Disease<br>Ileostomy at three days of age<br>Feeding difficulties-Poor sucking | Normal Delivery<br>BW 2.8 kg<br>Floppy<br>Feeding difficulties-Poor sucking                       | Normal Delivery<br>BW 3 Kg<br>Floppy<br>Feeding difficulties-Poor sucking                         | C-Section due to previous C/S<br>2 weeks in the hospital<br>Due to meconium aspiration<br>BW 2.8 kg<br>Floppy |
| <b>Growth History</b>                                                                 | Normal                                                                                                                                                  | Initial Failure to Thrive followed by normal growth                                                                                                     | Initial Failure to Thrive followed by Normal Growth                                                                                                                                         | Normal                                                                                            | Normal                                                                                            | Normal                                                                                                        |
| <b>Current Growth<br/>Parameters<br/>(Weight, Height,<br/>Head<br/>Circumference)</b> | Normal                                                                                                                                                  | Normal                                                                                                                                                  | Normal                                                                                                                                                                                      | Normal                                                                                            | Normal                                                                                            | Normal                                                                                                        |
| <b>Vision</b>                                                                         | Normal<br>Bilateral Squint                                                                                                                              | Severe anisometropia                                                                                                                                    | Normal                                                                                                                                                                                      | Normal                                                                                            | Normal                                                                                            | Normal<br>Bilateral Squint                                                                                    |
| <b>Hearing</b>                                                                        | Normal                                                                                                                                                  | Normal                                                                                                                                                  | Normal                                                                                                                                                                                      | Normal                                                                                            | Normal                                                                                            | Normal                                                                                                        |
| <b>Dysmorphic<br/>Features</b>                                                        | Broad forehead<br>Triangular Face<br>Brachycephaly,<br>Large low set ears<br>Prominent slender nose<br>Smooth Philtrum<br>Thin upper lips<br>Fetal pads | Broad forehead<br>Triangular Face<br>Brachycephaly,<br>Large low set ears<br>Prominent slender nose<br>Smooth Philtrum<br>Thin upper lips<br>Fetal pads | Broad forehead<br>Triangular Face<br>Brachycephaly,<br>Large low set ears<br>Prominent slender nose<br>Smooth<br>Philtrum<br>Thin upper lips<br>Fetal pads                                  | Broad forehead<br>Triangular Face<br>Smooth Philtrum<br>Prominent slender nose<br>Thin upper lips | Broad forehead<br>Triangular Face<br>Smooth Philtrum<br>Prominent slender nose<br>Thin upper lips | Broad forehead<br>Triangular Face<br>Prominent slender nose<br>Smooth Philtrum<br>Thin upper lips             |



|                                         |                                                                                                                                                                                                                                           |                                                                                                                                                            |                                                                             |                                                                                                    |                                                                                                                   |                                                                                                                  |
|-----------------------------------------|-------------------------------------------------------------------------------------------------------------------------------------------------------------------------------------------------------------------------------------------|------------------------------------------------------------------------------------------------------------------------------------------------------------|-----------------------------------------------------------------------------|----------------------------------------------------------------------------------------------------|-------------------------------------------------------------------------------------------------------------------|------------------------------------------------------------------------------------------------------------------|
| <b>Hypotonia</b>                        | Severe Since Birth                                                                                                                                                                                                                        | Severe Since Birth                                                                                                                                         | Severe Since Birth                                                          | Mild-moderate and improved with age                                                                | Mild-moderate and improved with age                                                                               | Mild-moderate and improved with age                                                                              |
| <b>Motor Milestones</b>                 | Cannot Sit without support, stand or walk                                                                                                                                                                                                 | Cannot Sit without support, stand or walk                                                                                                                  | Cannot Sit without support, stand or walk                                   | Sat at 18 months/Walk at 3 and a half years.                                                       | Sat at one year/Walk at 3 years                                                                                   | Sat at 10 months/Walk at 2 years                                                                                 |
| <b>Speech</b>                           | Babbles Only                                                                                                                                                                                                                              | Babbles Only                                                                                                                                               | Babbles only                                                                | Single word by 18 months /combined 2 words by 4yrs. Severe receptive and expressive language delay | Single word by 2 years/combined 2 words by 8yrs. Severe receptive and expressive language delay                   | Single word by 1 yr./combined 2 words 3 yrs.                                                                     |
| <b>Cognitive function</b>               | Severe Delay/IQ not assessable. Vineland Adaptive Behavior Scale performed at 6 years and 7 months, revealed communication skills at 1 month level, daily living skills at 6 months, social skills at 1 month and motor skills at 1 month | Severe Delay/IQ not assessable.                                                                                                                            | Severe Delay/IQ not assessable                                              | IQ (45/100)                                                                                        | .IQ (42/100)                                                                                                      | IQ( 43/100)                                                                                                      |
| <b>Other Medical /Surgical Problems</b> | Constipation<br>Gastroesophageal reflux<br>Recurrent aspiraion<br>Pneumonia<br>Positional posterior plagiocephaly<br>Bilateral orchidopexy<br>Inguinal hernia repair<br>Esotropia<br>(bilateral medial rectus muscle recession)           | Constipation<br>Gastroesophageal reflux<br>Recurrent aspiraion<br>pneumonia<br>Sepsis with Klepsiella<br>Pnuemonae<br>GT-Tube insertion and fundoplication | Constipation<br>Positional posterior plagiocephaly<br>bilateral orchidopexy | Constipation<br>Seizure disorder ( Onset 7yrs)<br>Controlled with monotherapy<br>Hyperactive       | Constipation<br>Seizure disorder ( Onset 7yrs)<br>Controlled with monotherapy<br>Hyperactive<br>Hyperpigmentation | Constipation<br>Seizure disorder ( Onset 3 and a half years)<br>Controlled with monotherapy<br>Hyperpigmentation |
| <b>Metabolic Screen</b>                 | Acylcarnitines Normal/Organic acids<br>Normal/Creatine Metabolism Panel                                                                                                                                                                   | Acylcarnitines Normal/Organic acids<br>Normal<br>Normal Serum Lactic acid                                                                                  | Acylcarnitines Normal/Organic acids<br>Normal/Creatine Metabolism Panel     | Acylcarnitines Normal<br>Organic acids Normal.                                                     | Acylcarnitines Normal<br>Organic acids Normal.<br>VLCFA Normal<br>Serum Biotinidase Normal                        | Acylcarnitines Normal<br>Organic acids Normal<br>Creatine Metabolism Panel Normal<br>Normal Serum Lactic         |

|                            |                                                                                                                                                                   |                                                                                                                                                                                                                                                                                                                                                                                                                                                                               |                                                                                                                                                                                              |                                                                                                      |                                                                                                      |                                                          |
|----------------------------|-------------------------------------------------------------------------------------------------------------------------------------------------------------------|-------------------------------------------------------------------------------------------------------------------------------------------------------------------------------------------------------------------------------------------------------------------------------------------------------------------------------------------------------------------------------------------------------------------------------------------------------------------------------|----------------------------------------------------------------------------------------------------------------------------------------------------------------------------------------------|------------------------------------------------------------------------------------------------------|------------------------------------------------------------------------------------------------------|----------------------------------------------------------|
|                            | Normal<br>Normal Serum<br>Lactic acid                                                                                                                             |                                                                                                                                                                                                                                                                                                                                                                                                                                                                               | Normal<br>Normal Serum<br>Lactic acid                                                                                                                                                        |                                                                                                      |                                                                                                      | acid.<br>Isoelectric focusing for<br>Transferrin Normal  |
| <b>Imaging</b>             | Normal Brain MRI                                                                                                                                                  | MRI brain ( 3 yrs. 9 months) revealed bilateral white matter abnormalities most prominent in the parietal regions in a fairly symmetric appearance. MRI brain (5 yrs 3 months) revealed interval progression of the parietal periventricular and frontal corona radiata and centrum semiovale increased signal intensity. PET-CT brain done (5 yrs 9 months) revealed diffuse hypo metabolism involving bilateral parieto-occipital regions, bilateral thalami and cerebellum | Small bony posterior fossa with fullness and crowding in the posterior fossa. Otherwise Normal 3 D-CT skull evaluation revealed brachycephaly but no craniosynostosis Skeletal survey normal | Normal Brain MRI                                                                                     | Normal Brain MRI                                                                                     | Normal Brain MRI                                         |
|                            |                                                                                                                                                                   |                                                                                                                                                                                                                                                                                                                                                                                                                                                                               |                                                                                                                                                                                              | Prominent temporal horn of the left lateral ventricle with relatively smaller-sized left hippocampus |                                                                                                      |                                                          |
| <b>Karyotype</b>           | Normal Male                                                                                                                                                       | Normal Male                                                                                                                                                                                                                                                                                                                                                                                                                                                                   | Normal Male                                                                                                                                                                                  | Normal Female                                                                                        | --                                                                                                   | Normal Female                                            |
| <b>Molecular Karyotype</b> | Malignant CNVs were not observed in the linkage interval                                                                                                          | Malignant CNVs were not observed in the linkage interval                                                                                                                                                                                                                                                                                                                                                                                                                      | Malignant CNVs were not observed in the linkage interval                                                                                                                                     | Malignant CNVs were not observed in the linkage interval                                             | Malignant CNVs were not observed in the linkage interval                                             | Malignant CNVs were not observed in the linkage interval |
| <b>Other Studies</b>       | Muscle biopsy microscopic examination, histochemical staining and electron microscopy were negative with no evidence of pathology. MECP2 Gene sequencing Negative |                                                                                                                                                                                                                                                                                                                                                                                                                                                                               | EEG, BSAEP and VEPs normal.                                                                                                                                                                  | EEG- generalized intermittent slow activity with slow background activity.                           | EEG- Nonspecific intermittent irregularities over both temporal r egions. No Epileptiform discharges | EEG-No Epileptiform Discharges                           |
